# Supplementary material for: Characterization of Regulatory T Cells in Patients Infected by Leishmania Infantum
Source: MDPI journal article supplement (doi:10.3390/tropicalmed8010018), 2022-12-27
Supplement: s1 [file s1]

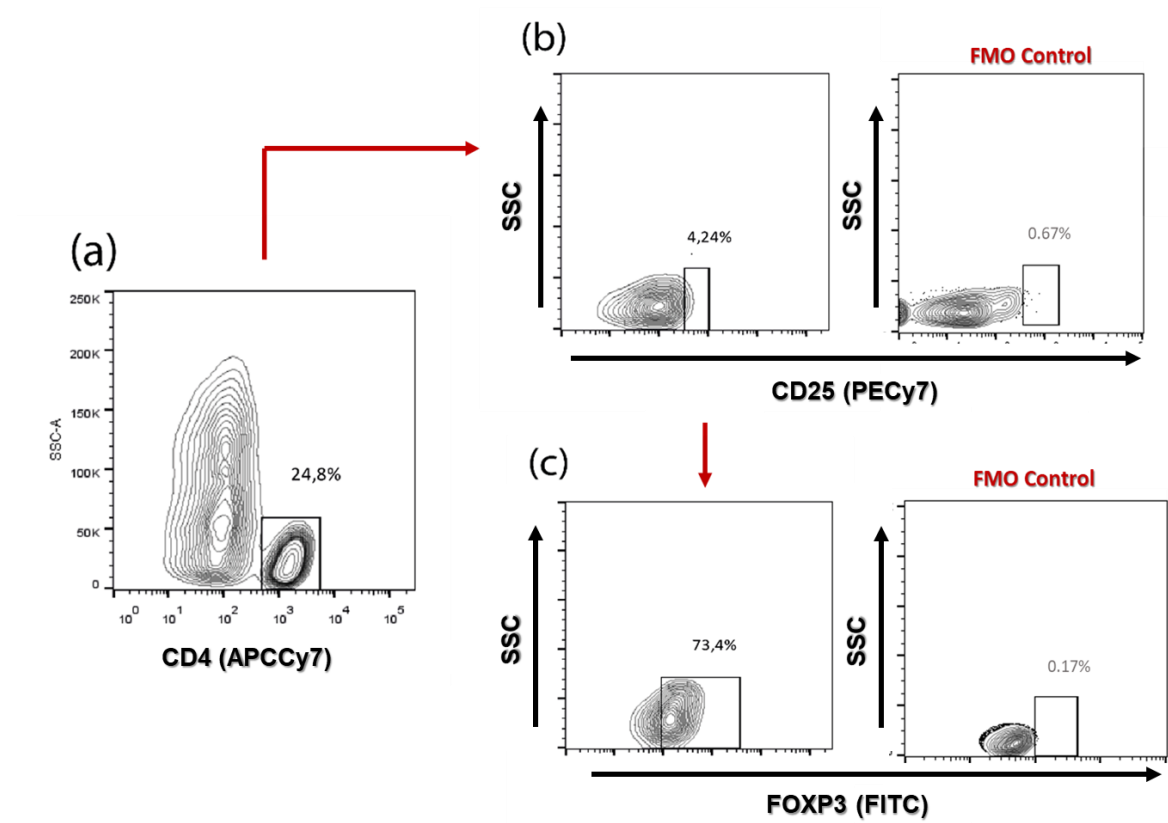

**Figure S1.** Representative analysis strategy for selecting Treg cells. (a) CD4<sup>+</sup> T lymphocyte gating based on the Side Scatter parameters–SSC and CD4<sup>+</sup>. (b) CD4<sup>+</sup>CD25<sup>high</sup> T cells using Side Scatter parameters–SSC × CD25<sup>+</sup> and CD25 FMO Control. (c) Selection of CD4<sup>+</sup>CD25<sup>high</sup>FOXP3<sup>+</sup> T cells using the Side Scatter parameters–SSC × FOXP3 and FOXP3 FMO Control.
